# Supplementary material for: CD46 Null Packaging Cell Line Improves Measles Lentiviral Vector Production and Gene Delivery to Hematopoietic Stem and Progenitor Cells
Source: PubMed Central journal article supplement — Mol Ther Methods Clin Dev. 2018 Nov 24;13:27–39. doi: 10.1016/j.omtm.2018.11.006 (PMC6310745; doi:10.1016/j.omtm.2018.11.006), 2018-11-24
Supplement: mmc1.pdf [file mmc1.pdf]

**OMTM, Volume 13**

**Supplemental Information**

**CD46 Null Packaging Cell Line Improves Measles**

**Lentiviral Vector Production and Gene Delivery**

**to Hematopoietic Stem and Progenitor Cells**

**Stosh Ozog, Craig X. Chen, Elizabeth Simpson, Olivia Garijo, Nina D. Timberlake, Petra Minder, Els Verhoeyen, and Bruce E. Torbett**

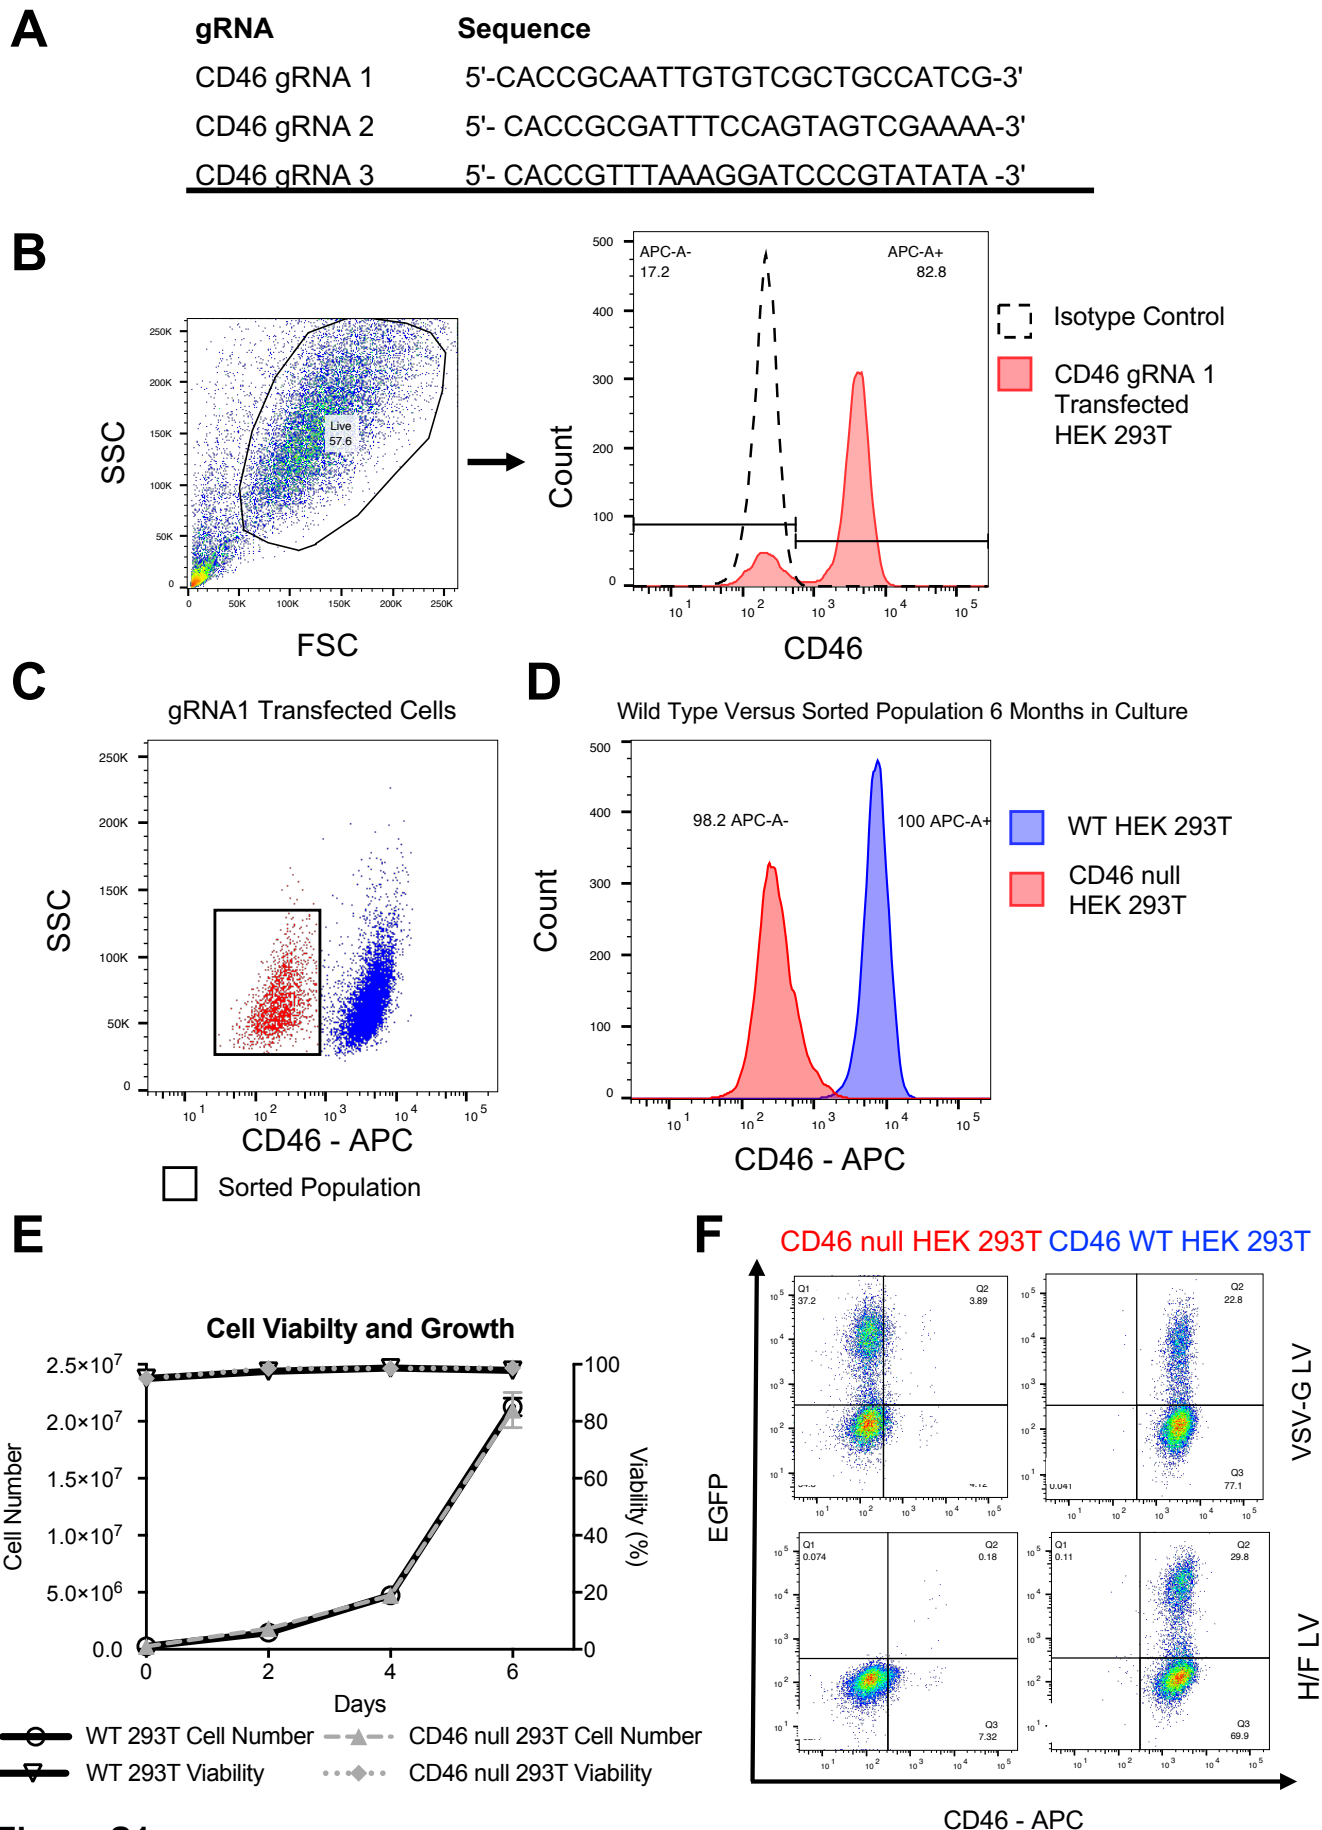

**Figure S1**

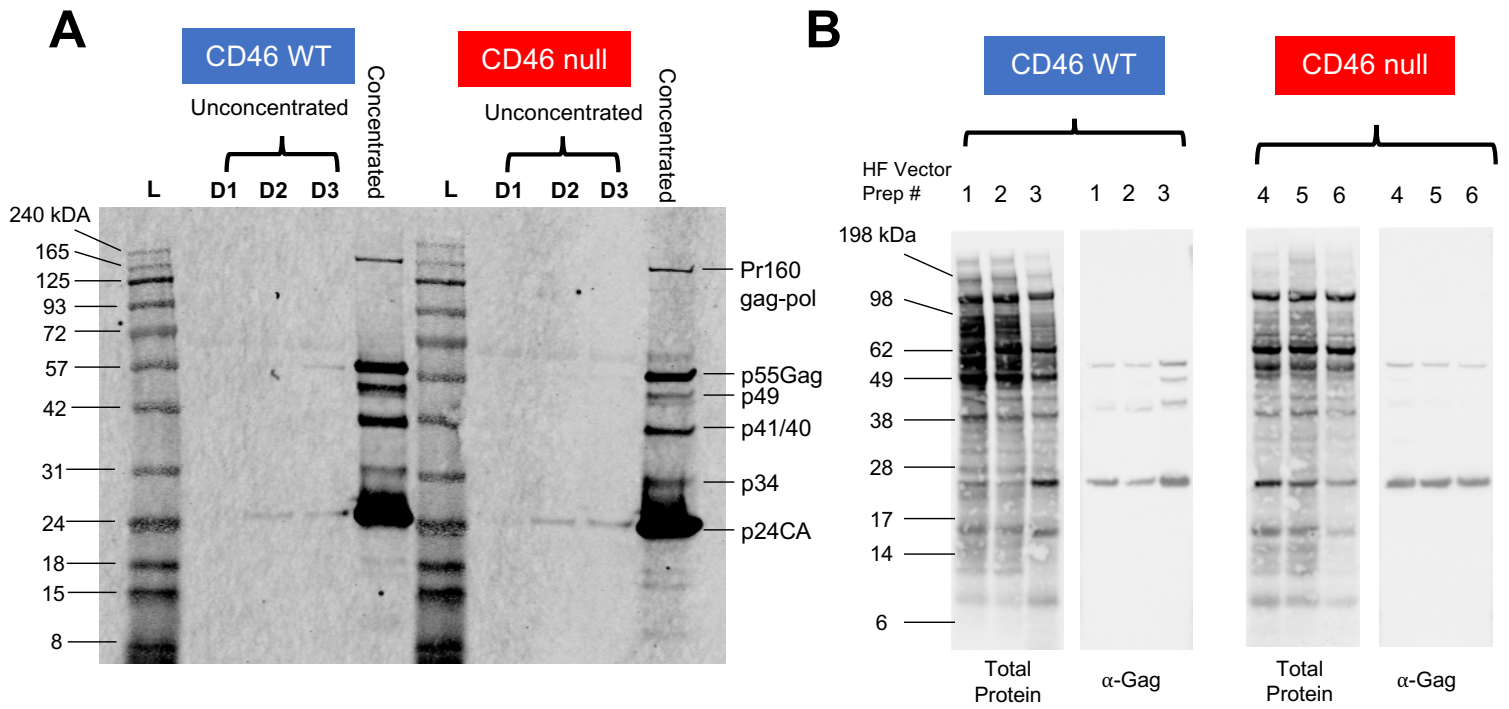

**C**

| Producer Cell Type | HF LV Prep # | % p24 CA of Total Gag | %p24 CA of Total Protein |
|--------------------|--------------|-----------------------|--------------------------|
| WT 293T            | 1            | 71.92                 | 3.18                     |
|                    | 2            | 63.72                 | 2.65                     |
|                    | 3            | 56.61                 | 3.52                     |
|                    | Mean         | 64.09                 | 3.12                     |
| CD46 null 293T     | 4            | 83.4                  | 7.56                     |
|                    | 5            | 86.78                 | 5.56                     |
|                    | 6            | 88.64                 | 6.07                     |
|                    | Mean         | 86.27                 | 6.40                     |

Figure S2

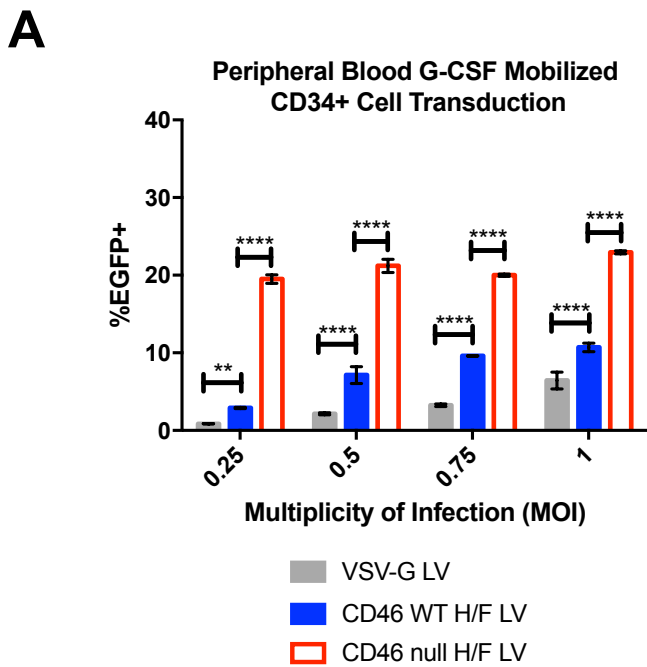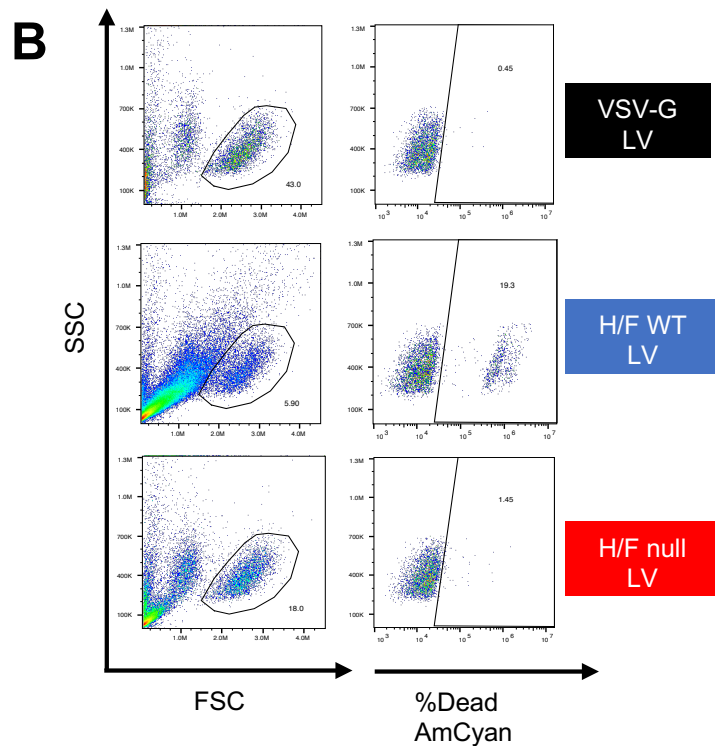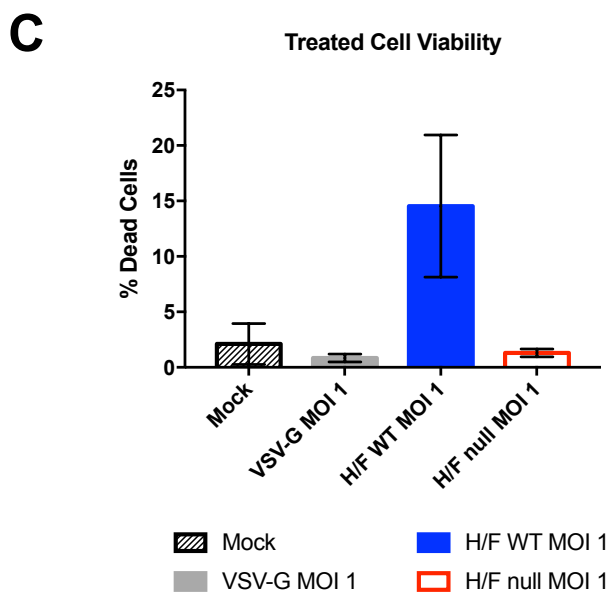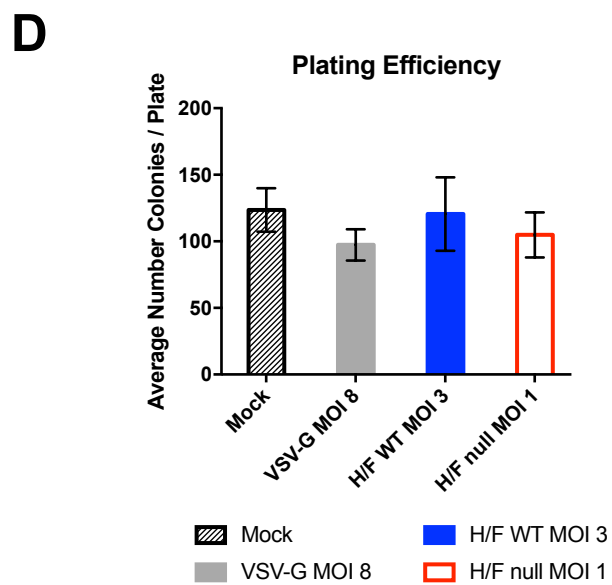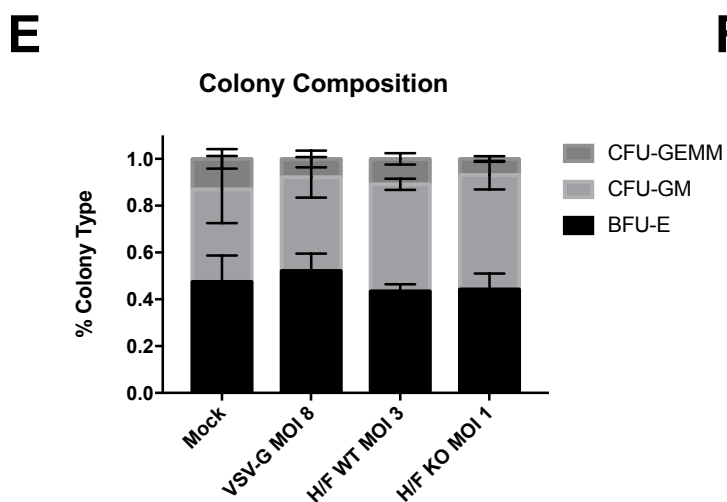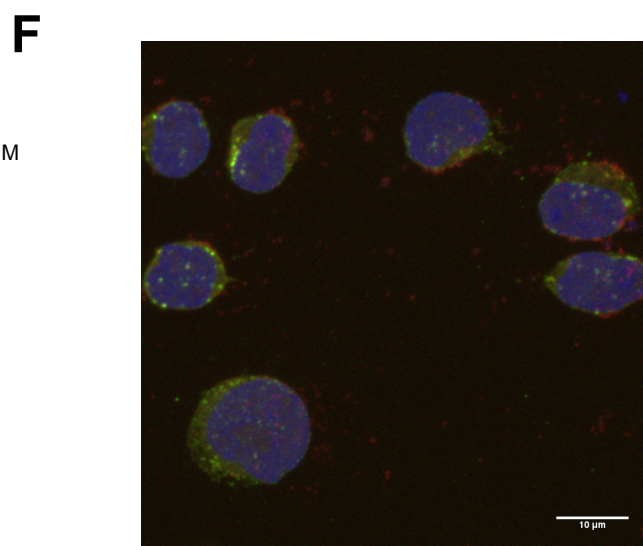

Figure S3

**Figure S1. CRISPR/Cas9 knockout of CD46 on HEK 293T cells renders them resistant to H/F LV but not VSV-G LV transduction but does not alter cellular growth.** (A) Sequences of tested guide RNAs targeting protospacer adjacent motifs in the first exon of the human CD46 gene. (B) HEK 293T cells transiently transfected with Cas9 + gRNA1, before evaluation by flow cytometric analysis for CD46 expression. (C) Fluorescence-assisted cell sorting scheme for puromycin selected Cas9/gRNA1 transfected HEK 293T cells, gating to exclude CD46 expressing cells (blue) and isolate CD46 null cells (red). (D) Wild-type (blue) and CD46 null sorted cells (red) maintained distinct CD46 expression profiles after 6 months of continued culture. (E) Wild-type and CD46 null HEK 293T cells demonstrate identical viability and proliferation profiles. (F) Representative FACS plots indicating transduction of CD46 null and wild-type HEK 293T cells by VSV-G LV (MOI 10) and H/F LV (MOI 1). Both cell types showed efficient transduction by VSV-G LV, while CD46 null HEK 293Ts were not transduced by H/F LV.

**Figure S2. H/F LV generated in CD46 null cells have increased purity and processed Gag content.** (A) Representative SDS-PAGE gel of H/F LV containing supernatant from wild-type and CD46 knockout HEK 293T cell collected 24 (D1), 48 (D2) and 72 hours (D3) post-transfection. Collected supernatant was also concentrated by ultracentrifugation over 20% sucrose, before matching for total protein and visualization by anti-Gag western blot. (B) Three vector preps each of wild-type and CD46 null cell generated H/F LV were evaluated by SDS-PAGE, quantifying total protein and anti-Gag western blot. (C) Quantification of mature p24 CA protein as a percent of total protein and total Gag signal in vector preps generated in wild-type or CD46 null producer cells.

**Figure S3. Improved transduction of peripheral blood mobilized CD34<sup>+</sup> cells, reduced cytotoxicity and no difference in UCB CD34<sup>+</sup> colony forming potential or type after transduction with CD46 null H/F LV.** (A) G-CSF mobilized peripheral blood-derived CD34<sup>+</sup> cells were transduced with either H/F LV derived from WT or CD46 null HEK 293T cells or VSV-G LV. Vector application was matched for MOI determined by serial dilution of vector on HEK 293T cells. Data presented as bar graphs (mean  $\pm$  s.d.). Statistical analysis using 2-way ANOVA with Tukey's multiple comparisons test; ns, not significant \* $p < 0.0332$ , \*\* $p < 0.0021$ , \*\*\* $p < 0.0002$ , \*\*\*\* $p < 0.0001$ . (B) UCB-derived CD34<sup>+</sup> HSPCs were treated with VSV-G LV, H/F LV derived from WT or CD46 null HEK 293T cells matched for MOI and evaluated for cell viability by flow cytometry 24 hours later. (C) Quantification of cell viability from flow cytometry analysis described above (n=2 donors, mean  $\pm$  s.d.). (D) Methocult colony-forming unit assay for UCB-derived CD34<sup>+</sup> cells transduced with VSV-G LV, wild-type HEK 293T produced H/F LV and CD46 null HEK 293T produced H/F LV show no difference in plating efficiency or (E) colony distribution for any vector treatment system, evaluated 14 days after plating (n=3). CFU-GEMM, colony forming unit-granulocyte, erythrocyte, monocyte, megakaryocyte; CFU-GM, colony forming unit-granulocyte, monocyte; BFU-E, erythroid burst-forming units. Data presented as bar graphs (mean  $\pm$  s.d.). (F) H/F LV generated in CD46 null HEK 293Ts show no contaminating cellular debris when applied to UCB-derived CD34<sup>+</sup> HSPCs as observed by confocal microscopy. Images taken of cells fixed 15 minutes post-vector addition, stained for EEA1<sup>+</sup> endosomes (green), vector p24<sup>+</sup> protein (red) and Hoescht stained for cell nuclei (blue).
